# Supplementary material
Source: PubMed Central journal article supplement (PMC4859810)

# Supplementary Figure 1 | Uncropped gel images from PAGE experiments

Figure 4a

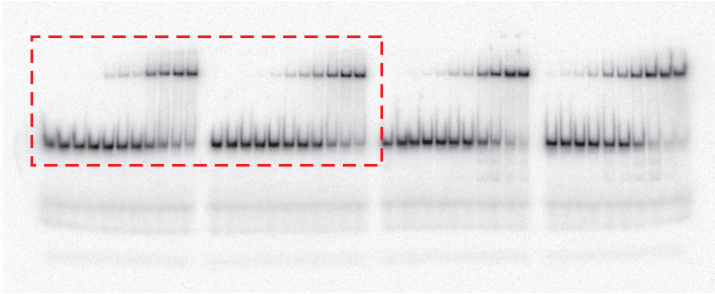

Figure 4b

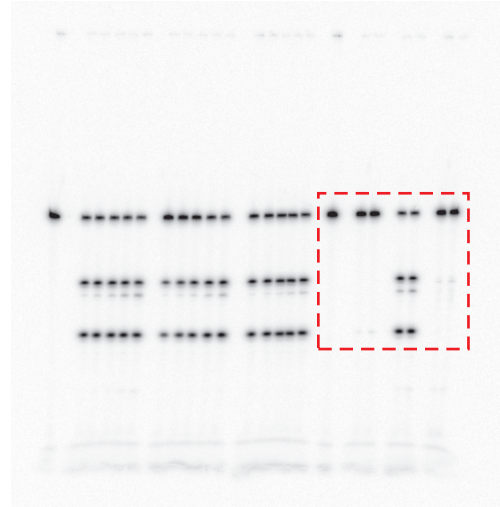

Figure 4d

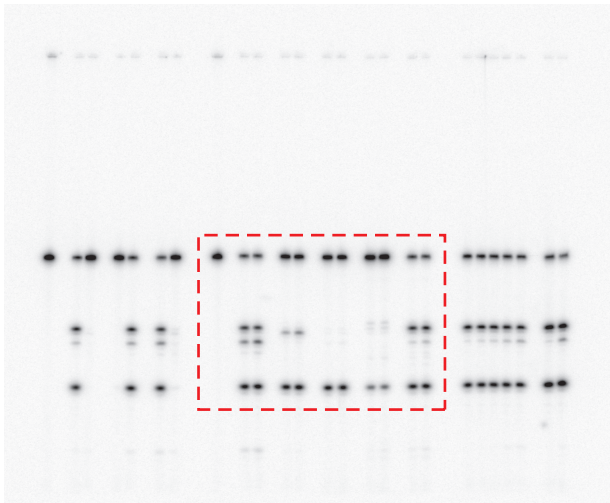

Extended Data Figure 1b

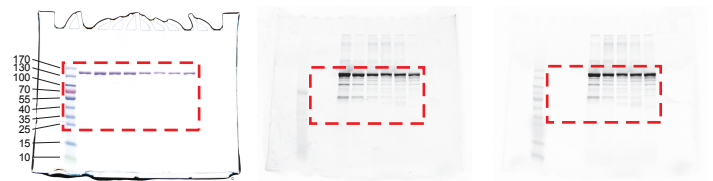

Extended Data Figure 6c

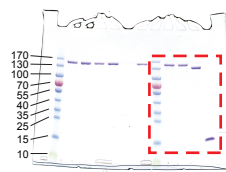

Extended Data Figure 1c

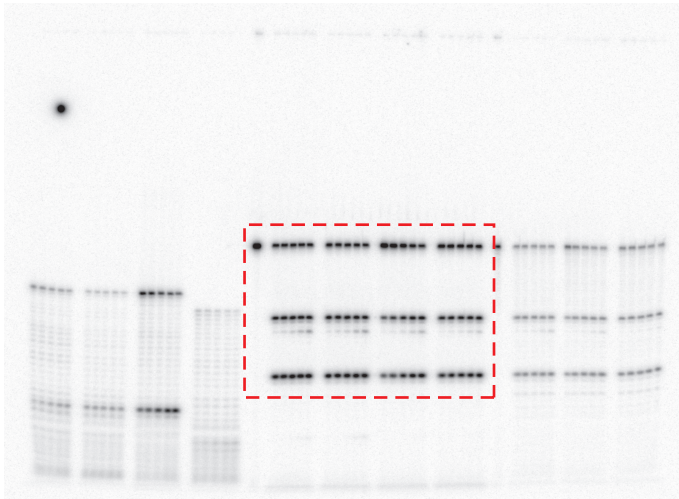

Extended Data Figure 6d

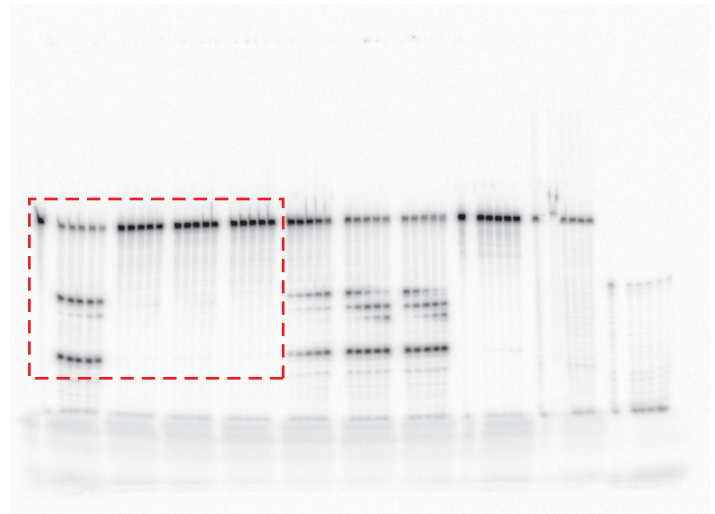

Supplement: NIHMS720510-supplement-supp_info2.pdf [file NIHMS720510-supplement-supp_info2.pdf]
